# Supplementary material for: A novel clinical-radiomics model predicted renal lesions and deficiency in children on diffusion-weighted MRI
Source: Frontiers journal article supplement (doi:10.3389/fphy.2022.920506), 2022-08-17
Supplement: Data_Sheet_1.PDF [file Data_Sheet_1.PDF]

**Supplementary Table 1. List of radiomics feature classes with descriptions from the PyRadiomics package**

| Radiomics feature                              | Description                                                                                                                                           |
|------------------------------------------------|-------------------------------------------------------------------------------------------------------------------------------------------------------|
| First-order statistics                         | Distribution of voxel intensities within the ROI                                                                                                      |
| Shape-based (2D)                               | Descriptors of the 2D size and shape of the ROI                                                                                                       |
| Gray-level co-occurrence matrix, GLCM          | Second-order joint probability function of the ROI                                                                                                    |
| Gray-level run length matrix, GLRLM            | Quantification of the length in the number of consecutive pixels that have the same gray-level value in the ROI                                       |
| Gray-level size zone matrix, GLSZM             | Quantification of gray-level zones (the number of connected pixels that share the same gray-level intensity) in the ROI                               |
| Neighboring gray tone difference matrix, NGTDM | Quantification of the difference between a gray value and the average gray value of its neighbors within the distance                                 |
| Gray-level dependence matrix, GLDM             | Quantification of gray-level dependencies (the number of connected pixels within distance $\delta$ that are dependent on the center pixel) in the ROI |
| Wavelet-based features                         | Wavelet filtering                                                                                                                                     |
| Exponential-based features                     | The index of the image intensity value                                                                                                                |
| Logarithm-based features                       | The logarithm of the absolute intensity of the image +1                                                                                               |

**Supplementary Table 2. Univariate analysis results of image features**

| Features                                         | Normal     | Abnormal  | P value |
|--------------------------------------------------|------------|-----------|---------|
| original_shape_Elongation                        | -0.27±0.78 | 0.25±1.11 | 0.000   |
| wavelet-LLH_glszm_ZoneEntropy                    | -0.13±1.04 | 0.12±0.95 | 0.039   |
| wavelet-LLH_glrIm_LongRunEmphasis                | -0.14±0.90 | 0.13±1.08 | 0.025   |
| wavelet-HLL_firstorder_Kurtosis                  | -0.19±0.70 | 0.17±1.19 | 0.003   |
| wavelet-HLL_firstorder_Range                     | -0.13±0.94 | 0.12±1.04 | 0.032   |
| wavelet-HLL_glszm_LargeAreaHighGrayLevelEmphasis | -0.13±0.91 | 0.12±1.04 | 0.035   |
| wavelet-HLH_ngtdm_Contrast                       | -0.13±0.91 | 0.12±1.06 | 0.035   |
| wavelet-HHH_ngtdm_Complexity                     | -0.15±1.01 | 0.13±0.98 | 0.020   |
| wavelet-LLL_glszm_SizeZoneNonUniformity          | -0.17±0.89 | 0.15±1.08 | 0.007   |
| exponential_glcM_lmc1                            | -0.14±1.07 | 0.12±0.92 | 0.032   |

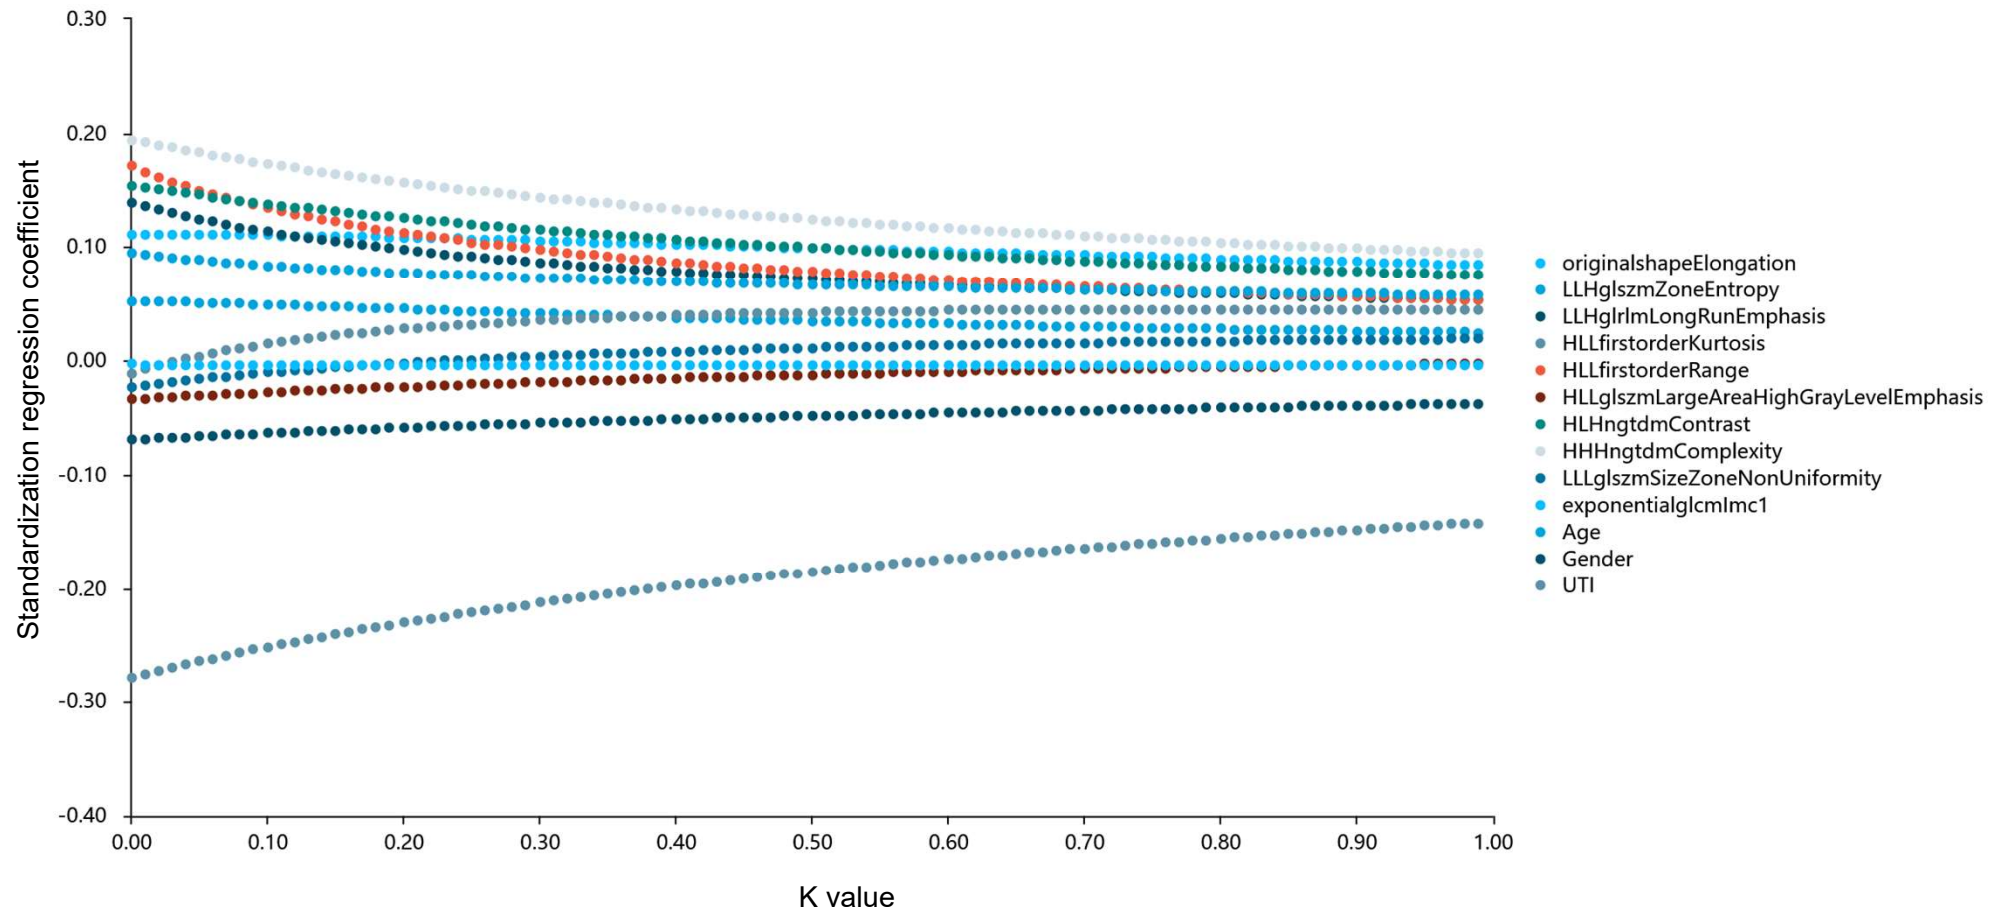

Supplementary Figure 1. Analysis of multicollinearity by assessing the variance inflation factor (VIF) among the selected features.

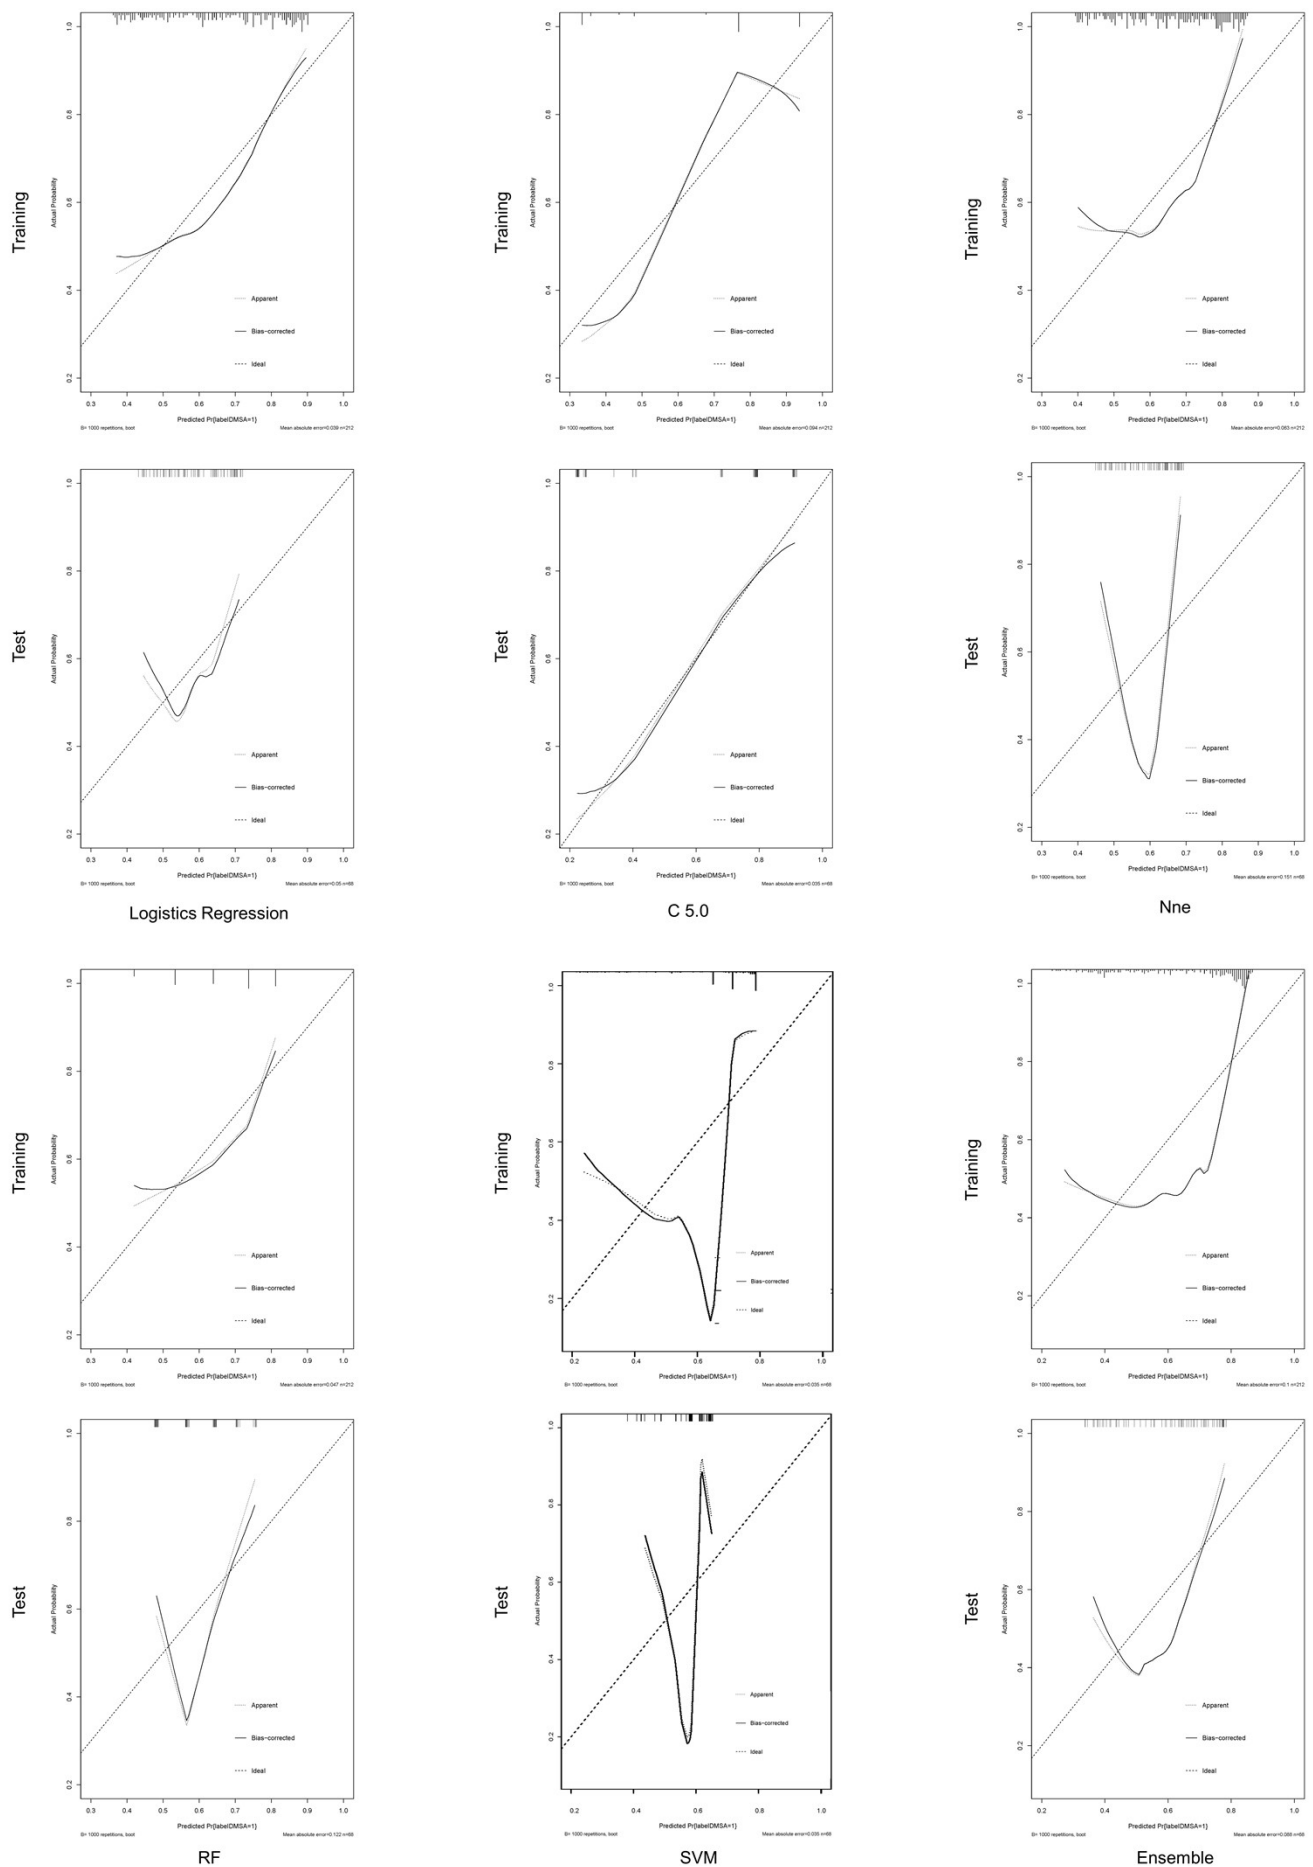

Supplementary Figure 2. Reliability curve of all models across training and test cohorts. The clinical–radiomics models: logistic regression (LR), decision tree (C5.0), Vector Machines (SVM), neural network (Nnet), Random Forest (RF) and Ensemble model.
